# Supplementary material for: Surface-initiated ring-opening polymerization from cellulose model surfaces monitored by a Quartz Crystal Microbalance
Source: Royal Society of Chemistry journal article supplement (doi:10.1039/c1sm06121f), 2011-11-02
Supplement: c1sm06121f.pdf [file c1sm06121f.pdf]

### Adsorption of PCL in CL on cellulose model surface before and after PCL grafting in the QCM.

A solution of PCL in  $\epsilon$ -caprolactone (corresponding to the polymer solution formed after 30 min reaction in the QCM) was introduced under a continuous flow of  $0.215 \text{ ml min}^{-1}$  for 30 minutes over a cellulose model surface and the surface was thereafter rinsed with pure monomer, in order to investigate the physisorption of polymer onto the surface. Likewise as previous performed experiments, a stable baseline was first obtained with only  $\epsilon$ -caprolactone. The same experiment was performed on a PCL-grafted cellulose model surface. The results can be seen in Figure 1.

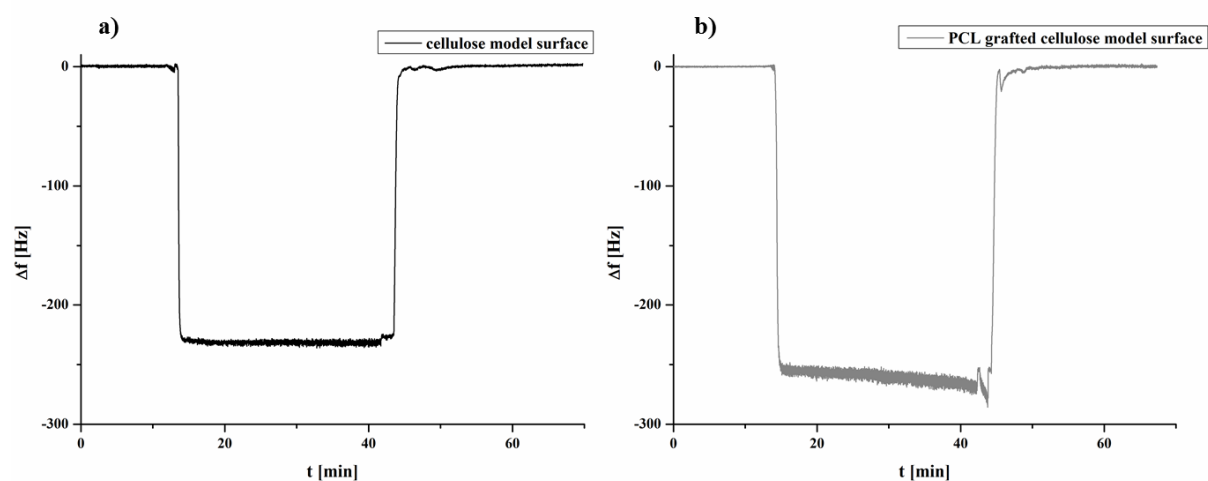

**Figure 1.** a) adsorption of PCL on a cellulose model surface (black line) b) adsorption of PCL on a PCL-grafted cellulose model surface (grey line).
